# Supplementary material for: Potential Association of Triglyceride Glucose Index with Cardiac Autonomic Neuropathy in Type 2 Diabetes Mellitus Patients
Source: PubMed Central journal article supplement — J Korean Med Sci. 2017 May 24;32(7):1131–8. doi: 10.3346/jkms.2017.32.7.1131 (PMC5461317; doi:10.3346/jkms.2017.32.7.1131), 2017-05-24
Supplement: jkms-32-1131-s001.pdf [file jkms-32-1131-s001.pdf]

**Supplementary Table 1.** Multiple linear regression analysis for TyG index in CAN

| Variables                    | $\beta$ | t      | P value |
|------------------------------|---------|--------|---------|
| Sex (male)                   | -0.153  | -1.103 | 0.275   |
| Age, yr                      | -0.217  | -1.550 | 0.129   |
| Duration, yr                 | -0.049  | -0.340 | 0.735   |
| Fasting blood sugar (mmol/L) | 0.124   | 0.870  | 0.389   |
| HbA1c                        | 0.030   | 0.220  | 0.318   |
| Basal metabolic index        | 0.077   | 0.640  | 0.525   |
| SBP                          | -0.032  | -0.230 | 0.821   |
| DBP                          | -0.036  | -0.270 | 0.784   |
| TC                           | -0.123  | -0.840 | 0.409   |
| HDL                          | -0.062  | -0.500 | 0.622   |
| TG                           | 0.112   | 0.750  | 0.456   |
| TyG index                    | 0.389   | 3.010  | 0.005   |
| HRD                          | 0.172   | 1.410  | 0.165   |
| HRS                          | -0.236  | -1.930 | 0.061   |
| Valsalva                     | -0.133  | -1.100 | 0.277   |
| BPS                          | 0.042   | 0.290  | 0.768   |
| BPH                          | 0.072   | 0.540  | 0.590   |
| Smoker                       | 0.313   | 2.149  | 0.036   |
| Nephropathy                  | 0.188   | -0.732 | 0.468   |
| Retinopathy                  | 0.310   | 2.309  | 0.025   |
| DPN                          | 0.013   | 0.086  | 0.932   |

Multivariate regression analysis for relationship between TyG index and CAN after adjustment of other clinical variables.

TyG = triglyceride glucose, CAN = cardiac autonomic neuropathy, HbA1c = glycated haemoglobin, SBP = systolic blood pressure, DBP = diastolic blood pressure, TC = total cholesterol, HDL = high density lipoprotein, TG = triglyceride, HRD = heart rate during deep breathing, HRS = heart rate variation during standing, BPS = blood pressure standing, BPH = blood pressure handgrip, DPN = diabetic peripheral neuropathy.
